# Supplementary material
Source: PubMed Central journal article supplement (PMC5140275)
Supplement: NIHMS822171-supplement-Supplemental_material.pdf [file NIHMS822171-supplement-Supplemental_material.pdf]

## Supplemental fig. I

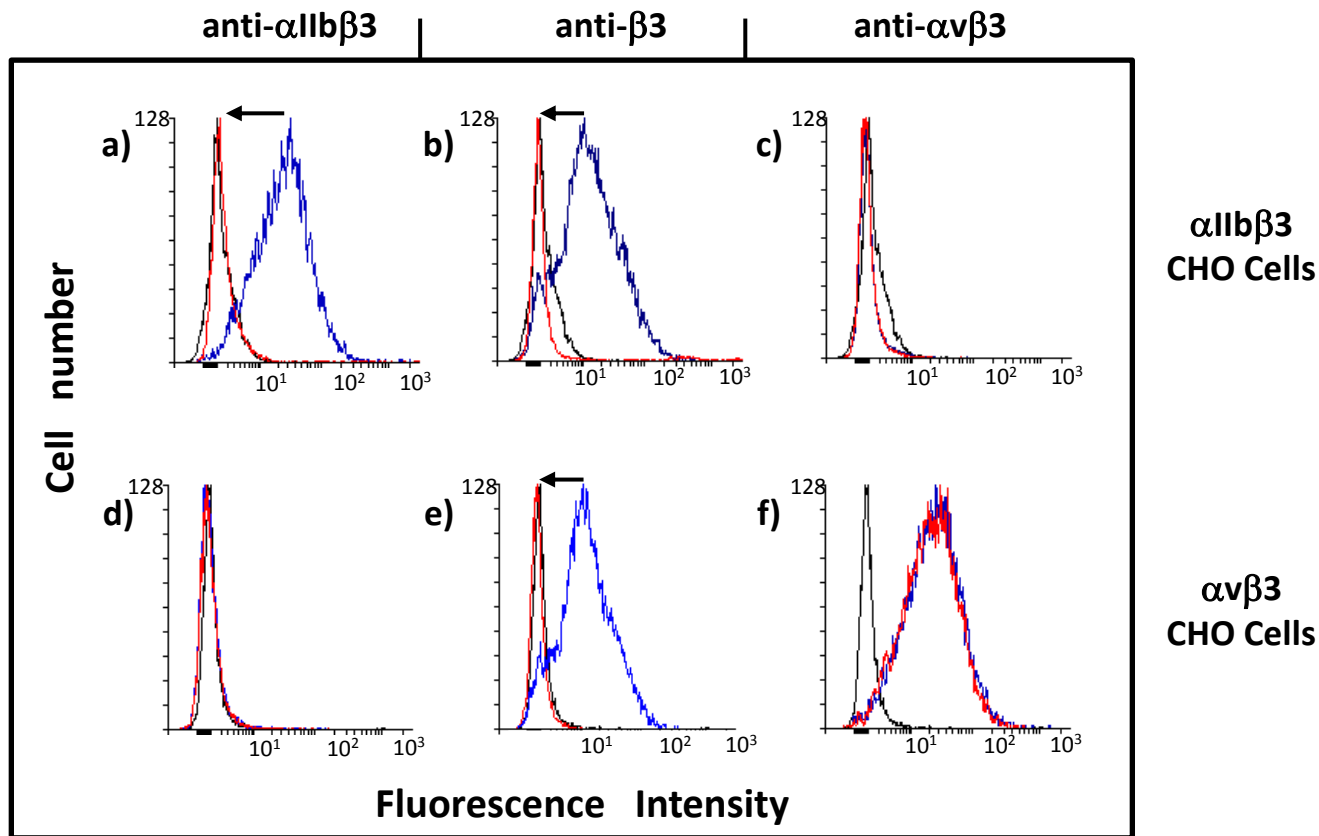

**Identification of an anti-HPA-1a  $\alpha$ v $\beta$ 3-specific subtype in +ICH cases after adsorption of other subtypes with  $\alpha$ IIb $\beta$ 3 beads.** Moabs against  $\alpha$ IIb $\beta$ 3 (a,d),  $\beta$ 3 (b, e) and  $\alpha$ v $\beta$ 3 (c,f) were analyzed by flow cytometry before (blue) and after (red) adsorption with  $\alpha$ IIb $\beta$ 3 beads, using  $\alpha$ IIb $\beta$ 3 or  $\alpha$ v $\beta$ 3 transfected CHO cells as target. Isotype mouse IgG was used as control (black). Note that after adsorption with  $\alpha$ IIb $\beta$ 3 beads, only anti- $\alpha$ v $\beta$ 3 activity remains (f), whereas the reactivity against  $\alpha$ IIb $\beta$ 3 (a) and against  $\beta$ 3 (b,e) disappears (indicated by arrows). Representative histograms from three independent experiments are shown.

## Supplemental fig. II

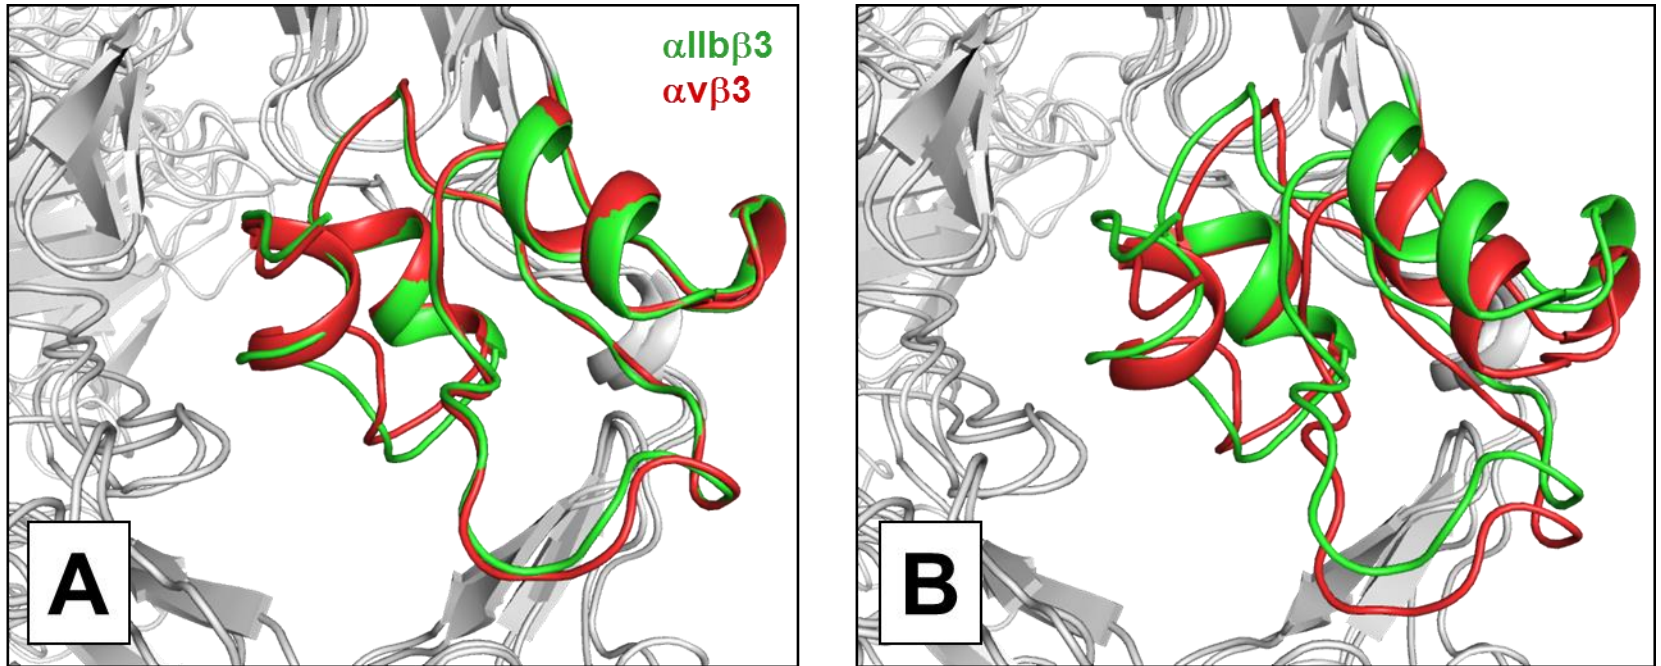

**Structural variation of the integrin  $\beta\text{3}$  subunit PSI domain in the context of different  $\alpha$ -subunit pairings.** The PSI domains from  $\alpha\text{V}\beta\text{3}$  and  $\alpha\text{IIb}\beta\text{3}$  in isolation (panel A) are nearly superimposable, however when placed in the context of the entire  $\beta\text{3}$  subunit that is paired with  $\alpha\text{V}$ , versus the structure of the  $\beta\text{3}$  subunit when paired with  $\alpha\text{IIb}$  (panel B), the PSI domains adopt related, but distinct, conformational states that could easily be differentially recognized by the immune system (structures produced in PyMol freeware).
