# Supplementary material
Source: PubMed Central journal article supplement (PMC5140275)

three types of anti-HPA-1a

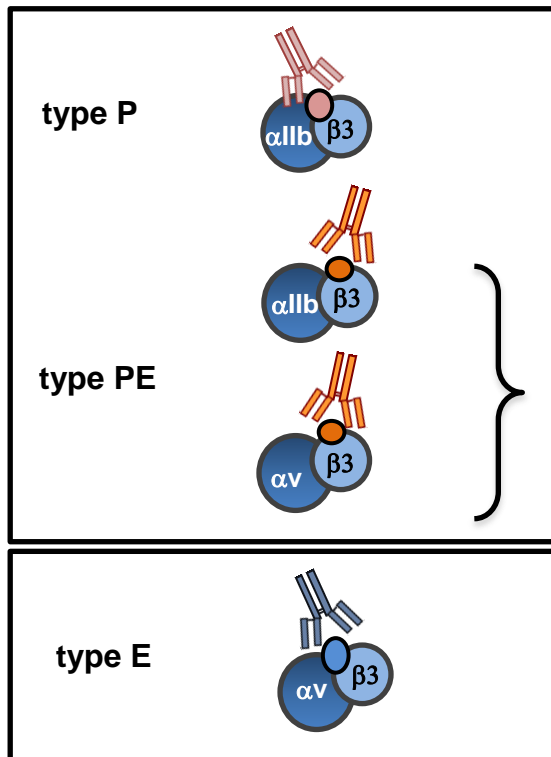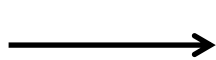

platelet  
clearance

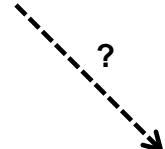

ICH in FNAIT

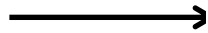

endothelial  
dysfunction

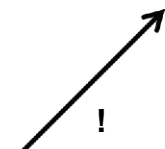

Supplement: NIHMS822171-supplement-Graphic_abstract.pdf [file NIHMS822171-supplement-Graphic_abstract.pdf]
